# Supplementary material
Source: PubMed Central journal article supplement (PMC1316030)
Supplement: jvirol_79_24_15368__1.pdf [file jvirol_79_24_15368__1.pdf]

## **SUPPLEMENTAL METHODS**

### Assessment of HIV-1 sequence diversity and divergence.

Nucleotide sequence diversity and divergence were estimated using the program SENDBS(1) using the HKY 85 plus gamma model. Parameters examined for each twin included: the average pairwise diversity across the 1995 and 2000 time points (dt), the average pairwise diversity in 1995 (dx), the average pairwise diversity in 2000 (dy), the average nucleotide divergence between the 1995 and 2000 time points (dxy), and the net nucleotide divergence between samples (da). The net nucleotide divergence was defined as the average diversity corrected for within-sample variation (1). Estimates of standard errors were calculated using 1000 bootstrap replications.

### Statistical comparisons

Quantitative variables were compared using the Wilcoxon rank sum test.

Categorical variables were compared using Fisher's exact test. Correlation was measured using Pearson's correlation coefficient.

## **SUPPLEMENTAL FIGURE LEGENDS**

Supplemental Figure 1. T cell receptor V $\beta$  spectratype profiles of the twins. T cell receptor V $\beta$  spectratype profiles of the twins from 12/00 (A) and 6/01 (B) are shown.

Supplemental Figure 2. HIV-1 sequences of the twins aligned against clade B consensus, NL4-3, and JR-CSF sequences. Sequencing of proviral DNA from 2000 was performed as described in the main text. Consensus amino acids for each twin were derived when at least three sequences were available for comparison. The consensus sequences for each twin are aligned against the Los Alamos HIV Database HIV-1 clade B consensus, NL4-3, and JR-CSF sequences (these latter two strains are utilized in our laboratories). Regions corresponding to recognized Clade B consensus peptides or regions of overlap of consecutive peptides are boxed.

- indicates same amino acid as clade B consensus

x indicates lack of consensus >50%

## SUPPLEMENTAL TABLE

### Env

| <b>Twin</b> | <b>1995<br/>diversity,<br/>dx (%)</b> | <b>se</b> | <b>2000<br/>diversity,<br/>dy (%)</b> | <b>se</b> | <b>Total<br/>Divergence<br/>dxy, %</b> | <b>se</b> | <b>Net<br/>divergence,<br/>da %</b> | <b>se</b> |
|-------------|---------------------------------------|-----------|---------------------------------------|-----------|----------------------------------------|-----------|-------------------------------------|-----------|
| <b>1-05</b> | 4.4                                   | 0.59      | 0.53                                  | 0.79      | 23.12                                  | 2.57      | 20.65                               | 2.49      |
| <b>1-06</b> | 6.42                                  | 0.77      | 0.64                                  | 0.54      | 8.96                                   | 1.1       | 5.43                                | 0.96      |

### Between twins

|             | <b>dxy %</b> | <b>se</b> | <b>da %</b> | <b>se</b> |
|-------------|--------------|-----------|-------------|-----------|
| <b>1994</b> | 12.48        | 1.38      | 7.1         | 1.13      |
| <b>2000</b> | 19.47        | 2.38      | 18.89       | 2.4       |

### Nef

| <b>Twin</b> | <b>1995<br/>diversity,<br/>dx (%)</b> | <b>se</b> | <b>2000<br/>diversity,<br/>dy (%)</b> | <b>se</b> | <b>Total<br/>Divergence<br/>dxy, %</b> | <b>se</b> | <b>Net<br/>divergence,<br/>da %</b> | <b>se</b> |
|-------------|---------------------------------------|-----------|---------------------------------------|-----------|----------------------------------------|-----------|-------------------------------------|-----------|
| <b>1-05</b> | 1.7                                   | 0.35      | 1.4                                   | 0.32      | 15.6                                   | 1.7       | 14.0                                | 1.7       |
| <b>1-06</b> | 0.6                                   | 0.18      | 1.9                                   | 0.47      | 5.5                                    | 0.9       | 4.2                                 | 0.8       |

### Between twins

|             | <b>dxy %</b> | <b>se</b> | <b>da %</b> | <b>se</b> |
|-------------|--------------|-----------|-------------|-----------|
| <b>1994</b> | 9.6          | 1.3       | 8.5         | 1.2       |
| <b>2000</b> | 15.9         | 1.7       | 14.3        | 1.7       |

### Supplemental Table 1. Diversity and divergence of HIV-1 sequences. Nucleotide

sequence diversity and divergence were estimated using the program SENDBS using the HKY 85 plus gamma model. Parameters examined for each twin include: the average pairwise diversity across the 1995 and 2000 time points (dt), the average pairwise diversity in 1995 (dx), the average pairwise diversity in 2000 (dy), the average nucleotide divergence between the 1995 and 2000 time

points (dxy), and the net nucleotide divergence between samples (da). The net nucleotide divergence is defined as the average diversity corrected for within-sample variation. Estimates of standard errors are calculated using 1000 bootstrap replications.

### **SUPPLEMENTAL REFERENCES**

1. **Nei, M., and L. Jin.** 1989. Variances of the average numbers of nucleotide substitutions within and between populations. *Mol Biol Evol* **6**:290-300.

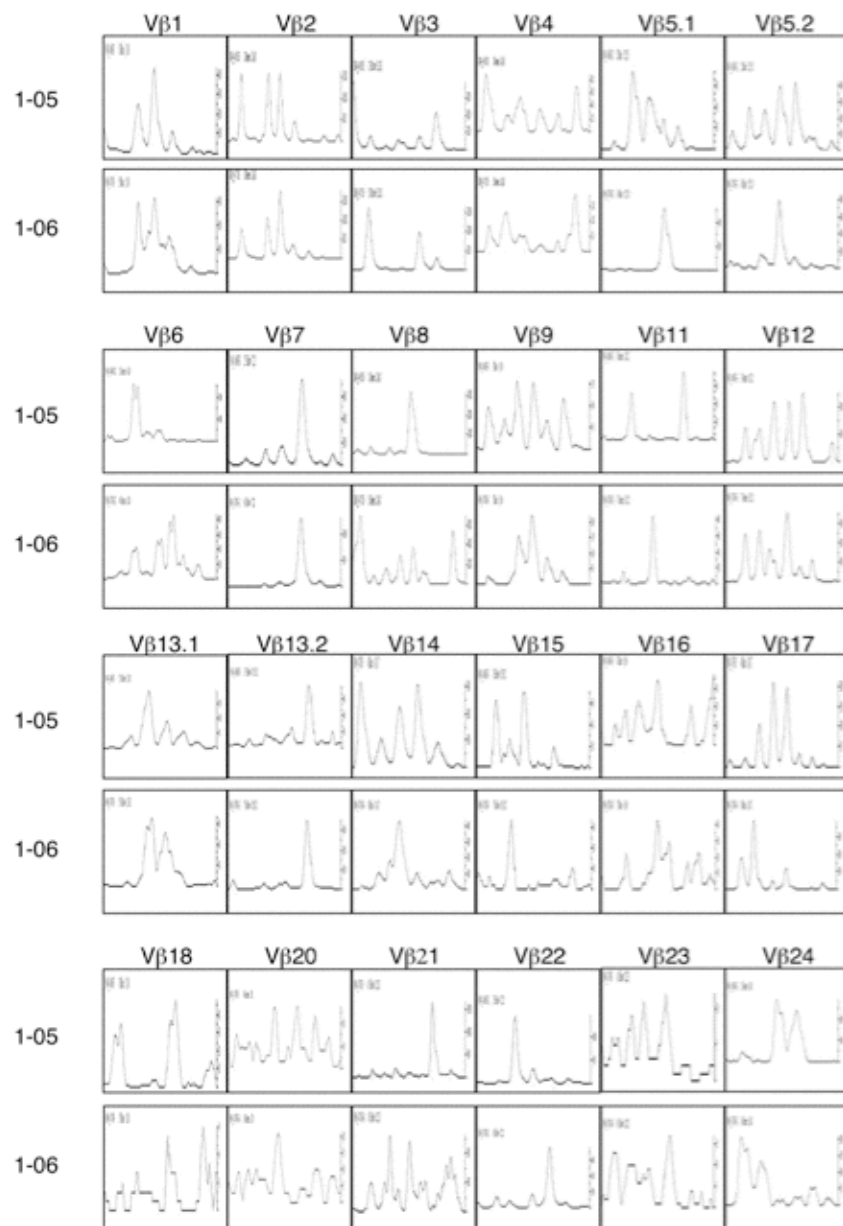

SUPPLEMENTAL FIGURE 1A

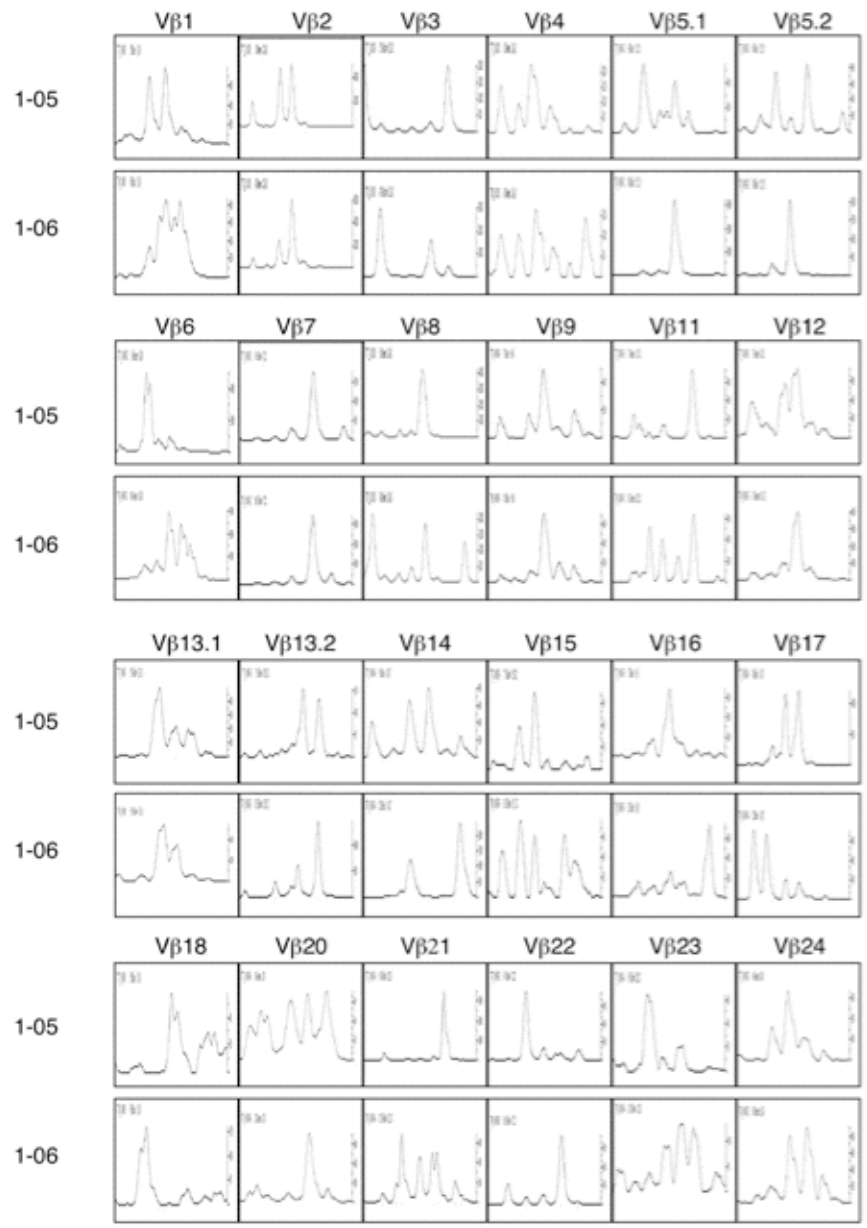

SUPPLEMENTAL FIGURE 1B

**SUPPLEMENTAL FIGURE 2**

**Gag Full Length**

|                |            |            |            |            |            |            |
|----------------|------------|------------|------------|------------|------------|------------|
| ConsensusB_Gag | MGARASVLSG | GELDRWEKIR | LRPGGKKKYK | LKHIVWASRE | LERFAVNPGL | LETSEGCRQI |
| NL4-3_Gag      | -----V---  | ---K-----  | -----Q--   | -----      | -----      | -----      |
| JR-CSF_Gag     | -----      | -----      | -----R     | -----      | -----      | --S-----   |
| Twin5_Gag      | -----I---  | -----      | -----      | -----      | -----S-    | ---Q--K--  |
| Twin6_Gag      | -----      | ---L-----  | S-----R    | -----      | -----      | -----K-    |
| ConsensusB_Gag | LGQLQPQLQT | GSEELRSLYN | TVATLYCVHQ | RIEVKDTKEA | LEKIEEEQNK | SKKKAQQAAA |
| NL4-3_Gag      | -----      | -----      | -I-V-----  | --D-----   | -D-----    | -----      |
| JR-CSF_Gag     | -----K-    | ---T-----  | -----      | ---I-----  | -----T-    | -M-----    |
| Twin5_Gag      | ME-----K-  | -----F-    | A--V-----  | --D-----   | -D-----E   | ---V-----  |
| Twin6_Gag      | -V-----    | -----      | A--V-----  | ---I-----  | -D-----    | -----      |
| ConsensusB_Gag | DTGNSSQV** | ***SQNYPIV | QNLQGQMVHQ | AISPRTLNAW | VKVVEEKAFS | PEVIPMFSAL |
| NL4-3_Gag      | ---N---**  | ***-----   | -----      | -----      | -----      | -----      |
| JR-CSF_Gag     | -----**    | ***-----   | -----      | -----      | ---I-----  | -----      |
| Twin5_Gag      | -----**    | SQV-----   | --A-----   | -----      | -----      | -----      |
| Twin6_Gag      | ---SC--ASC | GQT-----   | --I-----   | -----      | A-----     | -----      |
| ConsensusB_Gag | SEGATPQDLN | TMLNTVGGHQ | AAMQMLKETI | NEEAAEWDRL | HPVHAGPIAP | GQMREPRGSD |
| NL4-3_Gag      | -----      | -----      | -----      | -----      | -----      | -----      |
| JR-CSF_Gag     | -----      | -----      | -----      | -----      | -----      | -----      |
| Twin5_Gag      | -----      | -----      | ---H-----  | -----      | -----      | -----      |
| Twin6_Gag      | -----      | -----      | -----      | -----      | --PQ--V--  | --L-D----- |
| ConsensusB_Gag | IAGTTSTLQE | QIGWMTNNPP | IPVGEIYKRW | IILGLNKIVR | MYSPTSILDI | RQGPKEPFRD |
| NL4-3_Gag      | -----      | ---H---    | -----      | -----      | -----      | -----      |
| JR-CSF_Gag     | -----      | -----      | -----      | -----      | ---V-----  | -----      |
| Twin5_Gag      | -----      | ---H---    | -----      | -----      | -----      | K-----     |
| Twin6_Gag      | -----      | --Q--A---  | -----      | -----      | ---A-----  | -----      |
| ConsensusB_Gag | YVDRFYKTLR | AEQASQEVKN | WMTETLLVQN | ANPDCKTILK | ALGPAATLEE | MMTACQGVGG |
| NL4-3_Gag      | -----      | -----      | -----      | -----      | ---G-----  | -----      |
| JR-CSF_Gag     | -----      | ---T-----  | -----      | -----      | -----      | -----      |
| Twin5_Gag      | -----      | -----      | -----      | -----      | -----      | -----      |
| Twin6_Gag      | -----      | -----      | -----      | -----      | -----      | -----      |
| ConsensusB_Gag | PGHKARVLAE | AMSQV**TNS | ATIMMQRGNF | RNQRKTVKCF | NCGKEGHIK  | NCRAPRKKGC |
| NL4-3_Gag      | -----      | ---**--P   | ---I-K---  | -----      | -----      | -----      |
| JR-CSF_Gag     | -----      | ---**--P   | -----      | ---N---    | -----R     | -----      |
| Twin5_Gag      | -----      | ---**--    | -N-----    | K-----P--- | -----R     | -----      |
| Twin6_Gag      | -----      | ---NLA--   | -----V     | ---I-----  | -----R     | -----      |
| ConsensusB_Gag | WKCGKEGHQM | KDCTERQANF | LGKIWPSHKG | RPGNFLOSRP | EPTAPPEESF | RFGEETTPS  |
| NL4-3_Gag      | -----      | -----      | -----      | -----      | -----      | -----      |
| JR-CSF_Gag     | -----      | -E-----    | ---Y---    | -----      | -----      | ---A---    |
| Twin5_Gag      | -----      | -----      | ---L---    | ---T---    | --S-----L  | ---KA---   |
| Twin6_Gag      | -----      | -----      | ---AY---   | ---P---L   | -----      | K-R-----   |
| ConsensusB_Gag | QKQ*****E  | PIDKELYPLA | SLRSLFGNDP | SSQ        |            |            |
| NL4-3_Gag      | ---*****-  | -----      | ---S---    | ---        |            |            |
| JR-CSF_Gag     | ---EQKQ**- | -----T     | -----      | ---        |            |            |
| Twin5_Gag      | -N-*****-  | K-----T    | -----      | ---        |            |            |
| Twin6_Gag      | ---EPPQKQ- | Q-----T    | -----      | ---        |            |            |

**Pol 57-908**

|                |                     |                      |            |            |              |            |
|----------------|---------------------|----------------------|------------|------------|--------------|------------|
| ConsensusB_Pol | PQITLWQRPL          | VTIKIGGQLK           | EALLDTGADD | TVLEEMNLPG | RWKPKMIGGI   | GGFIKVRQYD |
| NL4-3_Pol      | -----               | -----                | -----      | -----      | -----        | -----G---  |
| JR-CSF_Pol     | -----               | -----                | -----      | ---D-D---  | -----        | -----      |
| Twin5_Pol      | <u>-----I-----</u>  | -----                | -----      | -----      | ---I---      | --LL-----  |
| Twin6_Pol      | <u>-----F--V---</u> | -E--                 | -----      | -----      | ---I---      | ---R-----  |
| ConsensusB_Pol | QILIEICGHK          | AIGTVLVGPT           | PVNIIGRNLL | TQIGCTLNFP | ISPIETVPVK   | LKPGMDGPKV |
| NL4-3_Pol      | -----               | -----                | -----      | -----      | -----        | -----      |
| JR-CSF_Pol     | --P-D-----          | -V-----              | -----      | -----      | -----        | -----      |
| Twin5_Pol      | --P-----            | <u>---VE-S--I---</u> | -----M     | --L-----   | -----        | -----      |
| Twin6_Pol      | --QV-----           | <u>---A--I---</u>    | V-----     | -----      | -----        | -----      |
| ConsensusB_Pol | KQWPLTEEKI          | KALVEICTEM           | EKEGKISKIG | PENPYNTPVF | AIKKKDSTKW   | RKLVDFRELN |
| NL4-3_Pol      | -----               | -----                | -----      | -----      | -----        | -----      |
| JR-CSF_Pol     | -----               | -----                | -----      | -----      | -----        | -----      |
| Twin5_Pol      | -----               | ---I--K-L            | -ED-----   | -----      | -----D--     | -----      |
| Twin6_Pol      | -----               | ---I-----            | -----      | -----      | -----N-DR-   | -----      |
| ConsensusB_Pol | KRTQDFWEVQ          | LGIPHPAGLK           | KKKSVTVLDV | GDAYFSVPLD | KDFRKYTAFT   | IPSINNETPG |
| NL4-3_Pol      | -----               | -----                | Q-----     | -----      | -----        | -----      |
| JR-CSF_Pol     | R-----              | -----                | -----      | -----      | -----        | -----      |
| Twin5_Pol      | -----               | -----                | -----      | -----I---  | E-----       | -----      |
| Twin6_Pol      | -K-----             | -----G--             | -----      | -----      | -----        | ---L-----  |
| ConsensusB_Pol | IRYQYNVLPO          | GWKGSPAIFQ           | SSMTKILEPF | RKQNPDIWIY | QYMDLIVGVS   | DLEIGQHRTK |
| NL4-3_Pol      | -----               | -----                | C-----     | -----      | -----        | -----      |
| JR-CSF_Pol     | -----               | -----                | -----      | -----I--   | -----        | -----      |
| Twin5_Pol      | -----               | <u>---S---T---</u>   | -----      | -----      | -----        | ---E-----  |
| Twin6_Pol      | -----               | -----X-----          | -----      | -----I--   | -----X-      | -----      |
| ConsensusB_Pol | IEELRQHLLR          | WGFTTPDKKH           | QKEPPFLWMG | YELHPDKWTV | QPIVLPEKDS   | WTVNDIQKLV |
| NL4-3_Pol      | -----               | -----                | -----      | -----      | -----        | -----      |
| JR-CSF_Pol     | -----K              | -----                | -----      | -----      | -----        | -----      |
| Twin5_Pol      | -K---EY-WK          | ---Y--R--            | -Q---R--   | -----      | -----        | -----      |
| Twin6_Pol      | -----K              | ---F--Q--            | -----H--   | -----      | -----        | -----      |
| ConsensusB_Pol | GKLNWASQIY          | AGIKVKQLCK           | LLRGTKALTE | VIPLTEEAEL | ELAENREILK   | EPVHGVYYDP |
| NL4-3_Pol      | -----               | ---R---              | -----      | -V-----    | -----        | -----      |
| JR-CSF_Pol     | -----               | -----                | -----      | -----K---  | -----        | -----      |
| Twin5_Pol      | -----               | <u>-----P-----</u>   | -IK-----   | IV--K---   | -----        | -----      |
| Twin6_Pol      | -----               | T-----               | -----      | IV--A---   | -----        | -----      |
| ConsensusB_Pol | SKDLIAEIQK          | QGQGOWTYQI           | YQEPFKNLKT | GKYARMRGAH | TNDVKQLTEA   | VQKIATESIV |
| NL4-3_Pol      | -----               | -----                | -----      | -----K---  | -----        | -----      |
| JR-CSF_Pol     | -----V---           | -----                | F-----     | -----T---  | -----        | ---N---    |
| Twin5_Pol      | --E-----            | -----S---            | -----      | ---K-KA--  | -----        | -----      |
| Twin6_Pol      | -----               | -----                | -----      | ---K-KS--  | ---R---      | ---T---X   |
| ConsensusB_Pol | IWGKTPKFKL          | PIQKETWEAW           | WTEYWQATWI | PEWEFVNTPP | LVKLWYQLEK   | EPIVGAETFY |
| NL4-3_Pol      | -----               | -----                | -----      | -----      | -----        | ---I-----  |
| JR-CSF_Pol     | ---I-----           | -----T-              | -----      | -----      | -----        | -----      |
| Twin5_Pol      | -----R-             | -----                | --D-----   | -----      | <u>-----</u> | -----      |
| Twin6_Pol      | -----               | -----T-              | -----      | -----      | -----        | -----      |
| ConsensusB_Pol | VDGAANRETK          | LGKAGYVTD            | GRQKVVSLTD | TTNQKTELQA | IHLALQDSGL   | EVNIVTDSQY |
| NL4-3_Pol      | -----               | -----                | -----P---  | -----      | -----        | -----      |
| JR-CSF_Pol     | -----               | -----S-              | -----      | -----      | -----        | -----      |
| Twin5_Pol      | -----               | -----NK              | -----I--   | -----      | -Y-----      | -----      |
| Twin6_Pol      | -----               | -----N-              | -----      | -----      | -Y-----      | -----??    |
| ConsensusB_Pol | ALGIIQAQPD          | KSESELVSQI           | IEQLIKKEKV | YLAWVPAHKG | IGGNEQVDKL   | VSAGIRKVLV |
| NL4-3_Pol      | -----               | -----                | -----      | -----      | -----G-      | -----      |



```

JR-CSF_Pol      -----
Twin5_Pol      -----E-----S-----
Twin6_Pol      ?????????? ?????????? ?????????? ?????????? ?????????? ??????????

ConsensusB_Pol LDGIDKAQEE HEKYHSNWRA MASDFNLPPV VAKEIVASCD KCQLKGEAMH GOVDCSPGIW
NL4-3_Pol      -----
JR-CSF_Pol      -----D-----I-----
Twin5_Pol      -----N-----
Twin6_Pol      -----N-----I-----C-----P-----

ConsensusB_Pol QLDCTHLEGK IILVAVHVAS GYIEAEVIPA ETGQETAYFL LKLAGRWPVK TIHTDNGSNF
NL4-3_Pol      -----V-----
JR-CSF_Pol      -----T-----
Twin5_Pol      -----I-----
Twin6_Pol      -----S-----

ConsensusB_Pol TSTTVKAACW WAGIKQEFGI PYNPQSQGVV ESMNKELKKI IGQVRDQAEH LKTAVQMAVF
NL4-3_Pol      -----I-----
JR-CSF_Pol      -----
Twin5_Pol      -----N-----
Twin6_Pol      -----

ConsensusB_Pol IHNFKRKGGI GG
NL4-3_Pol      -----
JR-CSF_Pol      -----
Twin5_Pol      -----
Twin6_Pol      -----

```

**Env gp120 267-463**

|                |            |             |            |            |            |            |
|----------------|------------|-------------|------------|------------|------------|------------|
| ConsensusB_Env | EEEVVIRSEN | FTDNAKTIIIV | QLNESVEINC | TRPNNNTRKS | IHIG**PGRA | FYTTGEIIGD |
| NL4-3_Env      | --D-----A- | -----       | ---T-----  | -----      | -R-QRG---- | -V-I-K-*N  |
| JR-CSF_Env     | --K-----D- | -----       | -----K---  | ---S-----  | -----      | -----      |
| Twin5_Env      | --QI----A- | -SN---I---  | --K-L-K-H- | M-----     | ---A-----  | -----Q---N |
| Twin6_Env      | -K--I---D- | -S----I---  | -----      | -----NR    | LS-----S   | ----RQ-V-- |
| ConsensusB_Env | IRQAHCNISR | AKWNNTLKQI  | VIKLREQFG* | NKTIVFNQSS | GGDPEIVMHS | FNCGGEFFYC |
| NL4-3_Env      | M-----     | ----A-----  | AS-----N   | ----I-K--- | -----T--   | -----      |
| JR-CSF_Env     | -----      | -Q-----     | -E-----N-  | -----TH--  | -----      | -----      |
| Twin5_Env      | -----V     | T---K--I-L  | TD--K-K-*  | -----H--   | -----      | -----      |
| Twin6_Env      | -----L-S   | T-----G--   | -K-----K-  | ----K-EK-- | -----      | -----      |
| ConsensusB_Env | NTTQLFNSTW | NGTWNDETEG  | IT*****    | LPCRIKQIIN | MWQEVGKAMY | APPIRGOIRC |
| NL4-3_Env      | -S-----    | FNSTWS---S  | NNTEGSDTIT | -----F--   | -----      | ----S----- |
| JR-CSF_Env     | -S-----    | -D-EKSSGTE  | GNDTII---- | -----      | -----      | ----K----- |
| Twin5_Env      | --SK--SG-- | --SSWTGAHW  | SNSTNDTII- | -----F--   | -----R---  | ----K---K- |
| Twin6_Env      | -L-K-----  | -VNGTIGTN-  | TNNNDTII-T | -----      | ---K-----  | ----E---K- |
| ConsensusB_Env | SSNITGLLLT | RDGGN*****  | ***NET     |            |            |            |
| NL4-3_Env      | -----      | -----       | -NN-GS     |            |            |            |
| JR-CSF_Env     | -----      | ----K-----  | -----S     |            |            |            |
| Twin5_Env      | I-----     | ----KVDNKT  | THE---     |            |            |            |
| Twin6_Env      | -----      | ----DKNGT   | GNGT—      |            |            |            |

**Vpr 4-96**

```
ConsensusB_Vpr  APEDQGPQRE PYNEWTLELL EELKNEAVRH FPRIWLHGLG QHIYETYGDT WAGVEAIIRI
NL4-3_Vpr      -----N-----S-----N-----Y-----
JR-CSF_Vpr     -----S-----Y-----
Twin5_Vpr      -----Q-----E-----T
Twin6_Vpr      -----H-----N-----GP--Y---Y-----M-CM
```

```
ConsensusB_Vpr  LQQLLFHFIR IGCQHSRIGI TRQRRARNGA SRS
NL4-3_Vpr      ---R-----V-----
JR-CSF_Vpr     ---R-----
Twin5_Vpr      -----V---R-----P--T-----
Twin6_Vpr      -----R-----P--T-----
```

**Tat 1-72**

```
ConsensusB_Tat  MEPVDPRLEP WKHPGSQPKT ACTNCYCKKC CFHCQVCFTT KGLGISYGRK KRRQRRRAPO
NL4-3_Tat      -----M- -A-----H-
JR-CSF_Tat     -----S---L-----P-
Twin5_Tat      -----G- --N-----S-----
Twin6_Tat      -----R- -----I- -----P-P
```

```
ConsensusB_Tat  DSQTHQVSLS KQ
NL4-3_Tat      N-***** **
JR-CSF_Tat     --***** **
Twin5_Tat      ----N-A--- --
Twin6_Tat      GG-----P- --
```

**Rev 1-25**

```
ConsensusB_Rev  MAGRSGDSDE ELLKTVRLIK FLYQS
NL4-3_Rev      -----IR-D**** *****
JR-CSF_Rev     -----D----D**** *****
Twin5_Rev      -----L-----
Twin6_Rev      -----R-- D--QA----- --H-
```

**Nef Full Length**

```
ConsensusB_Nef  MGGKWSKRSV VGWPTVRERM RRAE***** ****PAADGV GAVSRDLEKH GAITSSNTAA
60
NL4-3_Nef        -----S-- I---A----- -----***** ****----- -----
JR-CSF_Nef       -----H-- P--S----- -----PATDRV RQTE---V-- -----
Twin5_Nef        --N---M-* *--TR----- ---PAA*** ***E----- -----R- -----X-
Twin6_Nef        --S-C--C-- P--AA----- --TD***** ****---R- R-----P-Q- --S-----T

ConsensusB_Nef  NNADCAWLEA QEEEEVGFVP RPQVPLRPMT YKGALDLSHF LKEKGGLEGL IYSQKRQDIL
120
NL4-3_Nef        ---A----- ----- T----- --A-V----- ----- -H--R-----
JR-CSF_Nef       T----- Y-D----- ----- --A-I----- -----
Twin5_Nef        T----- --D----- T----- --A-V-I--- --N----- V---R-----
Twin6_Nef        S--A--MP-E --D----- ----- F--V----- -R----- -----E--

ConsensusB_Nef  DLWVYHTQGY FPDWQNYTPG PGRIPLTFG WCFKLVPEP EKVEEANEGE NNSLLHPMSL
180
NL4-3_Nef        ---I----- ----- --V----- --Y----- D-----K-- -T-----V--
JR-CSF_Nef       ---I----- -----A-- --V-F----- -----D- -----C-----Q
Twin5_Nef        ---I----- -----K-- --V----- -----D- DX----TX-- -----Q
Twin6_Nef        ----- ----- --V---C-- -----D- --R---A-- S-----S--Q

ConsensusB_Nef  HGMDDPEREV LVWKFDSRLA FHHMARELHP EYYKDC
NL4-3_Nef        ----- -E-R----- --V----- --F-N-
JR-CSF_Nef       -----K-- -----K-- L--V----- -----
Twin5_Nef        ---E----- -----L-- -R----- ---N-
Twin6_Nef        --TE---E-- -E-R----- ----- -FF---
```
